# Supplementary material for: New insights into the nonlinear effects of NO x on SOA formation from isoprene photo-oxidation
Source: Copernicus journal article supplement (doi:10.5194/egusphere-2024-3046), 2024-11-06
Supplement: Supplementary file 1 [file egusphere-2024-3046-supplement.pdf]

1  
2 *Supporting information for*

3 **New insights into the nonlinear effects of NO<sub>x</sub>-isoprene photo-**  
4 **oxidation**

5  
6 Xinbei Xu<sup>1</sup>, Yining Gao<sup>1</sup>, Si Zhang<sup>1\*</sup>, Luyao Chen<sup>1</sup>, Rongjie Li<sup>1</sup>, Zheng Li<sup>1</sup>, Rui Li<sup>1,2</sup>,  
7 Gehui Wang<sup>1,2\*</sup>

8  
9  
10  
11 <sup>1</sup>Key Laboratory of Geographic Information Science of the Ministry of Education, School of  
12 Geographic Sciences, East China Normal University, Shanghai 200241, China  
13 <sup>2</sup>Institute of Eco-Chongming, Cuinia Road, Chenjia Zhen, Chongming, Shanghai 202150,  
14 China

15  
16  
17  
18  
19  
20 \*Correspondence to: Dr. Si Zhang, E-mail address: [szhang@geo.ecnu.edu.cn](mailto:szhang@geo.ecnu.edu.cn)  
21 Prof. Gehui Wang, E-mail address: [ghwang@geo.ecnu.edu.cn](mailto:ghwang@geo.ecnu.edu.cn)

22  
23  
24  
25  
26 This PDF file includes:  
27 1. Text S1-S3  
28 2. References  
29 3. Figures S1-S3  
30 4. Table S1

31  
32

### 33 **Text-S1 Vapor wall loss corrections for SOA yield**

34 Our study also corrected loss of vapors to the chamber wall by the first-order wall-loss  
35 coefficient  $k_w$  ( $s^{-1}$ ) by Zhang et al. (2014). The value of  $k_w$  use the gas-phase transport  
36 parameters within a chamber. McMurry and Grosjean (1985) present a formula for  $k_w$ .

$$37 \quad k_w = \left(\frac{A}{V}\right) \frac{\left(\frac{\alpha_w \bar{c}}{4}\right)}{1.0 + \left(\frac{\pi}{2}\right) \left[\frac{\alpha_w \bar{c}}{4(k_e D_{gas})^{0.5}}\right]} \quad (1)$$

38 where  $A/V$  is the surface to volume ratio of the chamber (the ratio was  $4 \text{ m}^{-1}$  in this  
39 study),  $\alpha_w$  is the mass accommodation coefficient of vapors onto the chamber walls, and  
40  $10^{-5}$  was adopted according to the experimental results of Matsunaga and Ziemann (2010),  
41  $\bar{c}$  is the mean thermal speed of the molecules.  $k_e$  is the coefficient of eddy diffusion, and  
42  $0.12 \text{ s}^{-1}$  was estimated according to the values reported by previous studies for a  $4 \text{ m}^3$  Caltech  
43 chamber (McMurry and Grosjean, 1985).  $D_{gas}$  is the molecular diffusivity. For the type of  
44 molecules here,  $D_{gas}$  is  $\sim 1.38 \cdot 10^{-5} \text{ m}^2 \text{ s}^{-1}$  and  $\bar{c} \sim 299 \text{ m s}^{-1}$ . For a given vapor molecule, the  
45 mean thermal speed  $\bar{c}$  could be calculated according to the following equation:

$$46 \quad \bar{c} = \sqrt{\frac{8RT}{\pi MW}} \quad (2)$$

47 in which  $R$  is the ideal gas constant (i.e.,  $8.314 \text{ J mol}^{-1} \text{ K}^{-1}$ ),  $T$  is the experimental  
48 temperature ( $T=288.15 \text{ K}$  in this study), and  $MW$  is the molecular weight.

49

### 50 **Text-S2 The saturation vapor pressure ( $C^*$ )**

51 Based on the method developed by Li et al. (2016) to estimate saturated vapor pressure  
52 ( $C^*$ ) through molecular formulas, this study estimates the  $C^*$  of the main gas phase HOMs  
53 products in the photooxidation process of isoprene under the influence of  $\text{NO}_x$ :  
54

$$55 \quad \log C^* = (n_c^0 - n_c) b_c - n_0 b_0 - 2 \frac{n_c n_0}{n_c + n_0} b_{co} - n_N b_N - n_S b_S$$

56 where  $n_c^0$  is the number of reference carbon atoms,  $n_c$ ,  $n_0$ ,  $n_N$ ,  $n_S$  are the number of  
57 carbon, oxygen, nitrogen, and sulfur atoms, respectively;  $b_c$ ,  $b_0$ ,  $b_N$ ,  $b_S$  are the  
58 contribution of each atom to  $\log C^*$ , respectively, and  $b_{co}$  is the carbon-oxygen non-  
59 inertness factor.

60 **Text-S3 NO<sub>3</sub> calculation**

61 The NO<sub>3</sub> concentration were calculated to analyze the role of NO<sub>3</sub> in SOA formation. The  
 62 calculation methods are as follows:

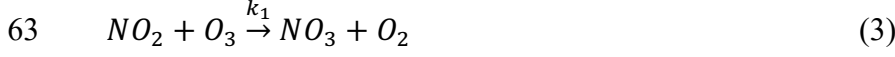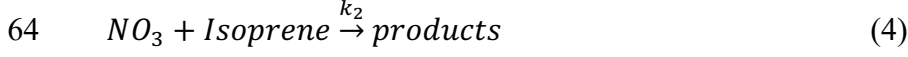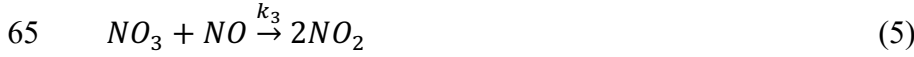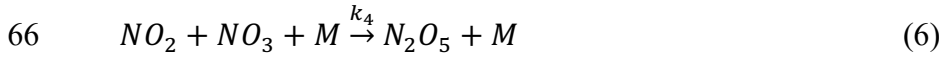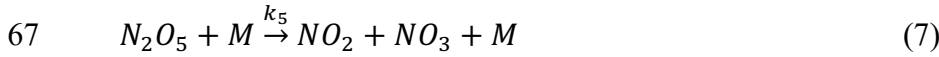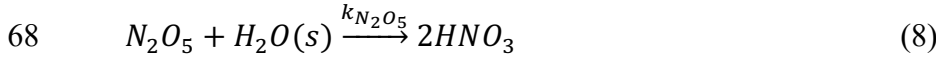

69 Once the NO<sub>3</sub> radical is produced via R3, it rapidly establishes thermal equilibrium with  
 70 N<sub>2</sub>O<sub>5</sub> in the presence of NO<sub>2</sub> (reactions (6) and (7)), which can be summarized as:

71  $[N_2O_5] = k_{eq}[NO_2][NO_3], k_{eq} = k_4/k_5$  (9)

72  $k_{eq}$  is calculated by the method given by Yan et al., (2023). Assuming that NO<sub>3</sub> and  
 73 N<sub>2</sub>O<sub>5</sub> are in a steady-state condition, their total formation rate is roughly the same as the  
 74 total loss rate, and much greater than the net change rate, then the steady-state NO<sub>3</sub> mixing  
 75 ratios are expressed by Eq. (10)

76  $[NO_3]_{SS} = \frac{k_1[NO_2][O_3]}{k_2[Isop] + K_3[NO] + J_{NO_3} + k_{N_2O_5}k_{eq}[NO_2]}$  (10)

77 With a room temperature, rate constant of  $k_1 = 3.2 \times 10^{-17} \text{ cm}^3 \text{ molecule}^{-1} \text{ s}^{-1}$ ;  $k_2 = 6.5$   
 78  $\times 10^{-13} \text{ cm}^3 \text{ molecule}^{-1} \text{ s}^{-1}$ ;  $k_3 = 2.6 \times 10^{-13} \text{ cm}^3 \text{ molecule}^{-1} \text{ s}^{-1}$ ;  $J_{NO_3}$  is the sum of the  
 79 photolysis coefficients of the two photolysis reactions of NO<sub>3</sub>, 0.176 s<sup>-1</sup> (Brown and Stutz,  
 80 2012). The  $k_{N_2O_5}$  is the heterogeneous uptake rate of N<sub>2</sub>O<sub>5</sub> on the aerosol surface, which  
 81 can be calculated by Eq. (11):

82  $k_{N_2O_5} = \frac{1}{4} cS\gamma$  (11)

83 Where  $C$  is the mean molecular speed of  $N_2O_5$ , which is  $240 \text{ m s}^{-1}$ ,  $S$  is the concentration of  
84 total particle surface area, which can be calculated based on the particle number size  
85 distribution, and  $\gamma$  is the uptake coefficient of  $N_2O_5$  (Hu et al., 2023).

86

## 87 **Reference**

- 88 Brown, S. S. and Stutz, J.: Nighttime radical observations and chemistry, *Chem. Soc. Rev.*, 41, 6405-6447,  
89 <https://doi.org/10.1039/c2cs35181a>, 2012.
- 90 Hu, H., Wang, H., Lu, K., Wang, J., Zheng, Z., Xu, X., Zhai, T., Chen, X., Lu, X., Fu, W., Li, X., Zeng, L., Hu,  
91 M., Zhang, Y., and Fan, S.: Variation and trend of nitrate radical reactivity towards volatile organic compounds  
92 in Beijing, China, *Atmos. Chem. Phys.*, 23, 8211-8223, <https://doi.org/10.5194/acp-23-8211-2023>, 2023.
- 93 Li, Y., Pöschl, U., and Shiraiwa, M.: Molecular corridors and parameterizations of volatility in the chemical  
94 evolution of organic aerosols, *Atmos. Chem. Phys.*, 16, 3327-3344, <https://doi.org/10.5194/acp-16-3327-2016>,  
95 2016.
- 96 Matsunaga, A. and Ziemann, P. J.: Gas-Wall Partitioning of Organic Compounds in a Teflon Film Chamber and  
97 Potential Effects on Reaction Product and Aerosol Yield Measurements, *Aerosol Sci. Technol.*, 44, 881-892,  
98 <https://doi.org/10.1080/02786826.2010.501044>, 2010.
- 99 McMurry, P. H. and Grosjean, D.: Gas and aerosol wall losses in Teflon film smog chambers, *Environ. Sci.*  
100 *Technol.*, 19, 1176-1182, <https://doi.org/10.1021/es00142a006>, 1985.
- 101 Yan, C., Tham, Y. J., Nie, W., Xia, M., Wang, H., Guo, Y., Ma, W., Zhan, J., Hua, C., Li, Y., Deng, C., Li, Y.,  
102 Zheng, F., Chen, X., Li, Q., Zhang, G., Mahajan, A. S., Cuevas, C. A., Huang, D. D., Wang, Z., Sun, Y., Saiz-  
103 Lopez, A., Bianchi, F., Kerminen, V.-M., Worsnop, D. R., Donahue, N. M., Jiang, J., Liu, Y., Ding, A., and  
104 Kulmala, M.: Increasing contribution of nighttime nitrogen chemistry to wintertime haze formation in Beijing  
105 observed during COVID-19 lockdowns, *Nat. Geosci.*, 16, 975-981, [https://doi.org/10.1038/s41561-023-01285-](https://doi.org/10.1038/s41561-023-01285-1)  
106 [1](https://doi.org/10.1038/s41561-023-01285-1), 2023.
- 107 Zhang, X., Cappa, C. D., Jathar, S. H., McVay, R. C., Ensberg, J. J., Kleeman, M. J., and Seinfeld, J. H.: Influence  
108 of vapor wall loss in laboratory chambers on yields of secondary organic aerosol, *Proc. Natl. Acad. Sci. U. S. A.*,  
109 111, 5802-5807, <https://doi.org/10.1073/pnas.1404727111>, 2014.

110

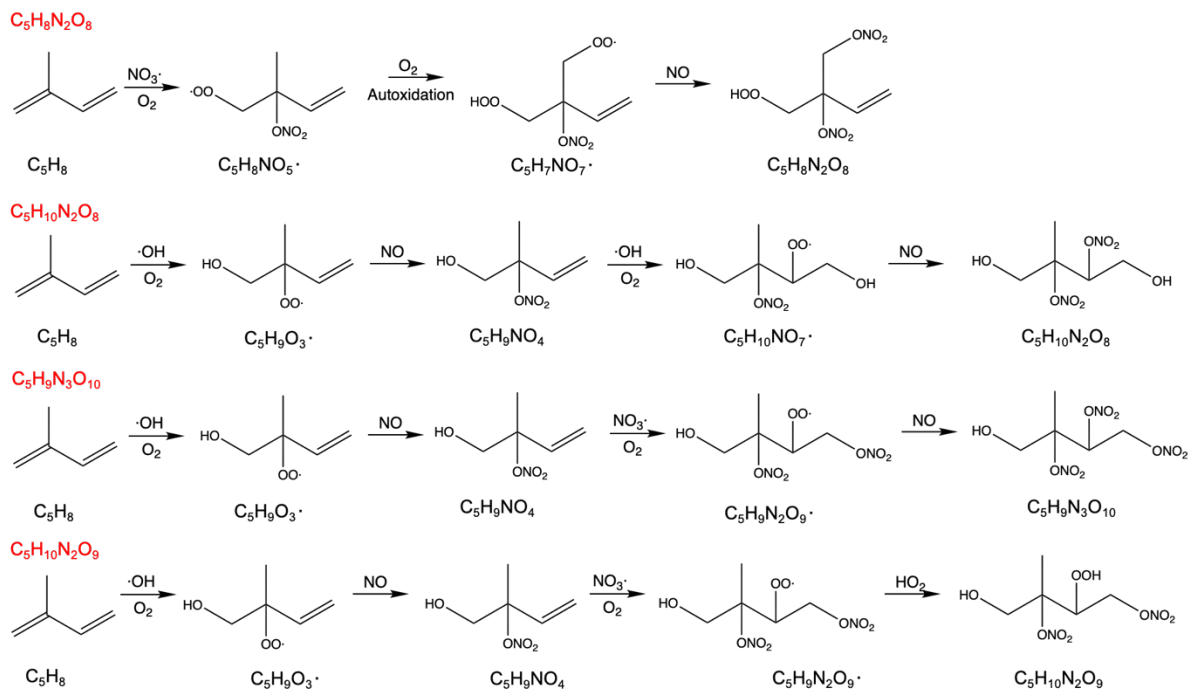

111

112

**Figure S1.** Simplified formation mechanism of C<sub>5</sub>H<sub>8</sub>N<sub>2</sub>O<sub>8</sub>, C<sub>5</sub>H<sub>10</sub>N<sub>2</sub>O<sub>8</sub>, C<sub>5</sub>H<sub>9</sub>N<sub>3</sub>O<sub>10</sub> and C<sub>5</sub>H<sub>10</sub>N<sub>2</sub>O<sub>9</sub>.

113

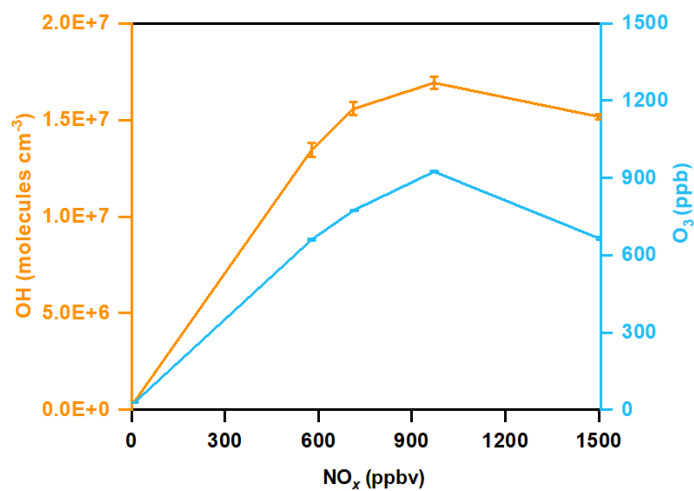

114

115

Figure S2. Variations of OH and O<sub>3</sub> concentrations.

116

117

118

119

120

121

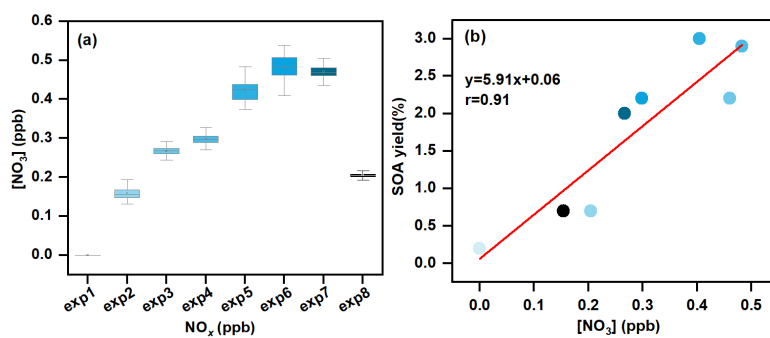

122

Figure S3. (a) calculated concentrations of NO<sub>3</sub> radicals in the varying NO/NO<sub>2</sub> experiments; (b) correlation between NO<sub>3</sub> and SOA yield.

125

**Table S1.** The  $\log_{10}C^*$  of low volatile organic products

| Molecular formula                                              | $\log_{10}C^*$ | VOC type <sup>a</sup> |
|----------------------------------------------------------------|----------------|-----------------------|
| C <sub>5</sub> H <sub>8</sub> N <sub>2</sub> O <sub>8</sub>    | -0.92          | LVOC                  |
| C <sub>5</sub> H <sub>10</sub> N <sub>2</sub> O <sub>8</sub>   | -0.92          | LVOC                  |
| C <sub>5</sub> H <sub>8</sub> N <sub>2</sub> O <sub>9</sub>    | -1.67          | LVOC                  |
| C <sub>5</sub> H <sub>10</sub> N <sub>2</sub> O <sub>9</sub>   | -1.67          | LVOC                  |
| C <sub>5</sub> H <sub>9</sub> N <sub>3</sub> O <sub>10</sub>   | -3.54          | LVOC                  |
| C <sub>5</sub> H <sub>9</sub> N <sub>3</sub> O <sub>11</sub>   | -4.30          | LVOC                  |
| C <sub>5</sub> H <sub>11</sub> N <sub>3</sub> O <sub>11</sub>  | -4.30          | LVOC                  |
| C <sub>5</sub> H <sub>9</sub> N <sub>3</sub> O <sub>12</sub>   | -5.06          | LVOC                  |
| C <sub>6</sub> H <sub>10</sub> N <sub>2</sub> O <sub>14</sub>  | -5.75          | ELVOC                 |
| C <sub>10</sub> H <sub>17</sub> N <sub>3</sub> O <sub>14</sub> | -8.08          | ELVOC                 |
| C <sub>10</sub> H <sub>17</sub> N <sub>3</sub> O <sub>16</sub> | -9.57          | ULVOC                 |
| C <sub>12</sub> H <sub>20</sub> NO <sub>17</sub>               | -8.71          | ULVOC                 |
| C <sub>15</sub> H <sub>20</sub> N <sub>2</sub> O <sub>14</sub> | -8.75          | ULVOC                 |
| C <sub>15</sub> H <sub>17</sub> N <sub>2</sub> O <sub>17</sub> | -10.78         | ULVOC                 |

127 <sup>a</sup>VOC type is defined according to the following ranges: ultralow volatility organic compounds (ULVOCs,  
128  $\log_{10} C^* < -8.5$ ), extremely low volatility organic compounds (ELVOCs,  $-8.5 < \log_{10} C^* < -4.5$ ), low volatility  
129 organic compounds (LVOCs,  $-4.5 < \log_{10} C^* < -0.5$ ), semivolatile organic compounds (SVOC,  $-0.5 < \log_{10} C^* <$   
130  $2.5$ ), intermediate volatility organic compounds (IVOC,  $2.5 < \log_{10} C^* < 6.5$ ), and volatile organic compounds  
131 (VOC,  $\log_{10} C^* > 6.5$ ). (Li et al., 2016)
